# Supplementary material for: Identification of Stem‐Like Cells in Atrial Myxoma by Markers CD44, CD19, and CD45
Source: Hindawi journal article supplement (doi:10.1155/2016/2059584), 2016-01-01
Supplement: f1 [file 2059584.f1.docx]

**Identification of Stem-like Cells in Atrial Myxoma by Markers CD44, CD19 and CD45**

Xianghe Song, Danni Liu, Jian Cui, Manqian Zhou, Hui Wang, Na Liu, Xin Qi, Zongjin Li

**Supplemental data**

**
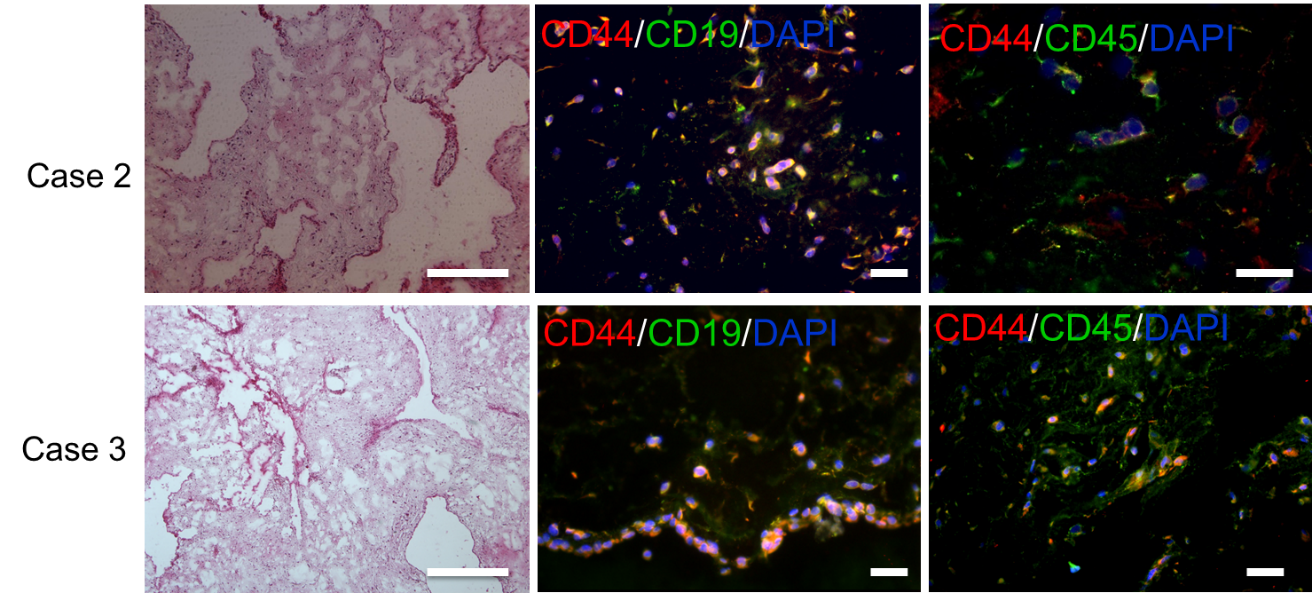
**

**Supplemental Figure 1. Phenotypic characterization of myxoma cells of case 2 and case 3.** Consistent results revealed by H&E staining and immunostaining. H&E staining of a myxoma tissue section revealed myxoma cells embedded within abundant myxoid matrix. Scale bar=100µm. Immunohistochemical characterization of myxomas revealed that myxoma cells were CD44, CD19 and CD45 positive. Scale bar=20µm.
